# Supplementary material
Source: MDPI journal article supplement (https://www.mdpi.com/2072-4292/12/16/2615)
Supplement: s1 [file s1]

Supplementary File

# Exploring annual urban expansions in Guangdong-Hong Kong-Macau Greater Bay Area: Spatiotemporal features and driving factors in 1986-2017

Jie Zhang <sup>1,2</sup>, Le Yu <sup>3</sup>, Xuecao Li <sup>4</sup>, Chenchen Zhang <sup>1,2</sup>, Tiezhu Shi <sup>1,5</sup>, Xiangyin Wu <sup>5</sup>, Chao Yang <sup>1</sup>, Wenxiu Gao <sup>5</sup>, Qingquan Li <sup>1,2,\*</sup> and Guofeng Wu <sup>1</sup>

<sup>1</sup> MNR Key Laboratory for Geo-Environmental Monitoring of Great Bay Area & Guangdong Key Laboratory of Urban Informatics & Shenzhen Key Laboratory of Spatial Smart Sensing and Services, Shenzhen University, Shenzhen 518060, China; jiezhang@szu.edu.cn (J.Z.); zhangchenchen2018@email.szu.edu.cn (C.Z.); tiezhushi@szu.edu.cn (T.S.); yangchao2017@email.szu.edu.cn (C.Y.); liqq@szu.edu.cn (Q.L.); guofeng.wu@szu.edu.cn (G.W.)

<sup>2</sup> College of Civil and Transportation Engineering, Shenzhen University, Shenzhen 518060, China

<sup>3</sup> Department of Earth System Sciences, Tsinghua University, Beijing 100084, China; leyu@tsinghua.edu.cn

<sup>4</sup> Department of Geological and Atmospheric Sciences, Iowa State University, Ames, IA 50011, USA; xuecaoli@iastate.edu

<sup>5</sup> School of Architecture & Urban Planning, Shenzhen University, Shenzhen 518060, China; 2017104016@email.szu.edu.cn (X.W.); wxgao@szu.edu.cn (G.W.)

\* Correspondence: liqq@szeu.edu.cn; Tel.: +86-10-6485-5094

## Contents:

### S1. Tables

Table S1. The major policies in GBA during 1986-2017

Table S2. The annual urban area of 11 cities in GBA during 1986-2017

Table S3. The annual urban area, AI, EI, and AGR of GBA during 1986-2017

### S2. Figures

Figure S1. The population and GDP of 11 cities in GBA during 1986-2017

### S3. Video

Video S1. The annual urban expansion process of GBA during 1986-2017

## 30 S1. Tables

31 Table S1. The major policies in GBA during 1979-2017

| Year | Area      | Policy                                                                                                                                                                                        | Main Contents                                                                                                         | Reference                                                                                                                                                                           |
|------|-----------|-----------------------------------------------------------------------------------------------------------------------------------------------------------------------------------------------|-----------------------------------------------------------------------------------------------------------------------|-------------------------------------------------------------------------------------------------------------------------------------------------------------------------------------|
| 1980 | Shenzhen  | Regulations of special economic zones of Guangdong province                                                                                                                                   | Establishing the Shenzhen special economic zone.                                                                      | <a href="http://www.npc.gov.cn/wxzl/gongbao/2000-12/10/content_5009544.htm">http://www.npc.gov.cn/wxzl/gongbao/2000-12/10/content_5009544.htm</a>                                   |
| 1984 | Guangzhou | Approval of the report on the opening of Guangzhou to the outside world                                                                                                                       | The state council agrees to set up economic and technological development zones.                                      | <a href="http://v5.pkulaw.cn/fulltext_fo rm.aspx?Db=chl&amp;Gid=7187">http://v5.pkulaw.cn/fulltext_fo rm.aspx?Db=chl&amp;Gid=7187</a>                                               |
| 1986 | Macao     | Provisions of the state council on encouraging foreign investment                                                                                                                             | Encourage enterprises and other organizations or individuals from Hong Kong and Macau to invest inland enterprises.   | <a href="http://project.mofcom.gov.cn/1800000121_23_69881_0_7.html">http://project.mofcom.gov.cn/1800000121_23_69881_0_7.html</a>                                                   |
| 1988 | Huizhou   | Notice of the state council on expanding the coastal economic open zones in Guangdong province                                                                                                | Huizhou will be included in the expanded scope of the coastal economic open zone in Guangdong province.               | <a href="https://www.pkulaw.com/chl/2dee81fb7c12e05bbdfb.html?keyword=%E6%83%A0%E5%B7%9E%20">https://www.pkulaw.com/chl/2dee81fb7c12e05bbdfb.html?keyword=%E6%83%A0%E5%B7%9E%20</a> |
| 1991 | Guangzhou | Notice of the state council concerning the approval of the national high-tech industrial development zone                                                                                     | Upgrading of Guangzhou Tianhe hi-tech industrial development zone to the national hi-tech industrial development zone | <a href="https://www.pkulaw.com/chl/4999c79a449c90e4bdfb.html?keyword=%E5%B9%BF%E5%B7%9E%20">https://www.pkulaw.com/chl/4999c79a449c90e4bdfb.html?keyword=%E5%B9%BF%E5%B7%9E%20</a> |
| 1993 | Huizhou   | Notice of the state council on approval of the establishment of Guangzhou Nansha economic and technological development zone and Huizhou Daya bay economic and technological development zone | Approved to establish the DaYa bay economic and technological development zone in Huizhou.                            | <a href="http://www.cnki.com.cn/Article/CJFDTotale/GWYB199311009.htm">http://www.cnki.com.cn/Article/CJFDTotale/GWYB199311009.htm</a>                                               |
| 2000 | Shenzhen  | Reply from the general office of the state council on the establishment of export zones                                                                                                       | The state agrees to set up Shenzhen as a pilot export zone.                                                           | <a href="http://www.gov.cn/gongbao/content/2000/content_60225.htm">http://www.gov.cn/gongbao/content/2000/content_60225.htm</a>                                                     |

|      |                                |                                                                                                                                                                  |                                                                                                                                                              |                                                                                                                                                 |
|------|--------------------------------|------------------------------------------------------------------------------------------------------------------------------------------------------------------|--------------------------------------------------------------------------------------------------------------------------------------------------------------|-------------------------------------------------------------------------------------------------------------------------------------------------|
| 2003 | Hong Kong, Macao               | Notice of the general office of the state council on the implementation of the closer economic partnership arrangement between the mainland and Hong Kong/Macao. | Strengthening the close economic and trade relations between the mainland, Hong Kong and Macao.                                                              | <a href="http://www.gov.cn/gongbao/content/2005/content_63362.htm">http://www.gov.cn/gongbao/content/2005/content_63362.htm</a>                 |
|      | Zhuhai, Macao                  | Approval of the state council on the establishment of Zhuhai-Macao cross-border industrial zone                                                                  | The Zhuhai-Macao cross-border industrial zone is planned to be formed by reclamation in Zhuhai and Macao special administrative region, respectively.        | <a href="http://www.gov.cn/gongbao/content/2004/content_63058.htm">http://www.gov.cn/gongbao/content/2004/content_63058.htm</a>                 |
| 2007 | Shenzhen                       | Notice of the state council approving the opening of Futian port in Shenzhen, Guangdong province                                                                 | The state council approved the opening of Futian port in Shenzhen, Guangdong province.                                                                       | <a href="http://www.gov.cn/gongbao/content/2007/content_686112.htm">http://www.gov.cn/gongbao/content/2007/content_686112.htm</a>               |
| 2010 | PRD* (Pearl River Delta)       | Notice of the state council on printing and distributing the national plan for functional zones                                                                  | Establishing the Pearl River Delta.                                                                                                                          | <a href="http://www.gov.cn/zwggk/2011-06/08/content_1879180.htm">http://www.gov.cn/zwggk/2011-06/08/content_1879180.htm</a>                     |
| 2012 | Guangzhou, Shenzhen, Zhuhai    | The notice of the state council on printing and distributing the 12th five-year plan for the development of the national Marine economy                          | Relying on the major ports such as Guangzhou, Shenzhen, Zhanjiang, Zhuhai and Shantou to build a world-class port group and international logistics centers. | <a href="http://www.gov.cn/zwggk/2013-01/17/content_2314162.htm">http://www.gov.cn/zwggk/2013-01/17/content_2314162.htm</a>                     |
| 2015 | Guangzhou, Shenzhen, Zhuhai    | The general plan of the China (Guangdong) pilot free trade zone                                                                                                  | Establishing the China (Guangdong) pilot free trade zone.                                                                                                    | <a href="http://www.gov.cn/zhengce/content/2015-04/20/content_9623.htm">http://www.gov.cn/zhengce/content/2015-04/20/content_9623.htm</a>       |
| 2016 | GBA                            | Guidelines of the state council on deepening Pearl River Delta regional cooperation                                                                              | Establishing the Guangdong-Hong Kong-Macao Greater Bay Area.                                                                                                 | <a href="http://www.gov.cn/zhengce/content/2016-03/15/content_5053647.htm">http://www.gov.cn/zhengce/content/2016-03/15/content_5053647.htm</a> |
| 2017 | Guangzhou, Shenzhen, Zhongshan | The development plan for the 13th five-year plan for a modern comprehensive transportation system                                                                | Improving the infrastructure networks and promote the construction of comprehensive transportation.                                                          | <a href="http://www.gov.cn/zhengce/content/2017-02/28/content_5171345.htm">http://www.gov.cn/zhengce/content/2017-02/28/content_5171345.htm</a> |

---

Note:

I. The Pearl River Delta (PRD) covers nine cities including Guangzhou, Foshan, Zhaoqing, Shenzhen, Dongguan, Huizhou, Zhuhai, Zhongshan and Jiangmen.

II. The Pan-pearl River Delta Region comprises nine provinces in southern, southeastern and southwestern China and two special administrative regions (Fujian, Guangdong, Guangxi, Guizhou, Hainan, Hunan, Jiangxi, Sichuan, Yunnan, Hong Kong and Macau).

III. The original government policies are in Chinese.

**Table S2. The annual urban area of 11 cities in GBA during 1986-2017 (Unit: km<sup>2</sup>)**

|      | Macao | Dongguan | Foshan  | Guangzhou | Hong Kong | Huizhou | Jiangmen | Shenzhen | Zhaoqing | Zhongshan | Zhuhai |
|------|-------|----------|---------|-----------|-----------|---------|----------|----------|----------|-----------|--------|
| 1986 | 4.33  | 95.83    | 57.43   | 82.17     | 70.95     | 37.38   | 92.36    | 74.11    | 55.91    | 53.44     | 28.82  |
| 1987 | 4.96  | 112.94   | 97.40   | 149.54    | 77.86     | 43.27   | 105.84   | 87.79    | 65.09    | 63.27     | 33.49  |
| 1988 | 5.20  | 126.77   | 160.99  | 240.91    | 83.01     | 56.85   | 113.13   | 111.89   | 68.03    | 68.41     | 36.27  |
| 1989 | 5.55  | 134.95   | 215.12  | 317.90    | 85.69     | 62.60   | 119.94   | 123.60   | 72.26    | 75.83     | 39.14  |
| 1990 | 5.82  | 142.65   | 273.58  | 390.53    | 88.36     | 69.11   | 123.36   | 136.63   | 73.87    | 78.55     | 42.12  |
| 1991 | 6.00  | 160.17   | 335.44  | 456.27    | 91.05     | 76.87   | 127.62   | 157.92   | 75.31    | 85.85     | 45.85  |
| 1992 | 6.20  | 188.33   | 391.36  | 524.97    | 93.83     | 88.03   | 135.05   | 188.27   | 78.45    | 101.31    | 49.55  |
| 1993 | 6.48  | 242.70   | 439.81  | 576.96    | 96.76     | 109.07  | 150.38   | 231.98   | 85.21    | 123.16    | 58.20  |
| 1994 | 7.08  | 306.65   | 496.16  | 638.30    | 100.15    | 127.38  | 165.59   | 273.33   | 94.19    | 145.60    | 71.26  |
| 1995 | 7.46  | 362.71   | 565.37  | 706.23    | 103.61    | 139.81  | 184.27   | 305.68   | 103.88   | 174.52    | 79.15  |
| 1996 | 7.71  | 403.04   | 669.05  | 800.57    | 107.62    | 149.66  | 194.81   | 332.68   | 111.77   | 187.27    | 83.62  |
| 1997 | 7.98  | 433.08   | 729.48  | 857.86    | 112.08    | 158.39  | 205.58   | 354.45   | 117.69   | 198.72    | 87.72  |
| 1998 | 8.29  | 468.50   | 772.12  | 905.67    | 116.73    | 168.02  | 219.51   | 379.44   | 124.73   | 218.61    | 91.82  |
| 1999 | 8.52  | 506.55   | 803.62  | 942.36    | 120.90    | 177.53  | 231.42   | 407.34   | 128.37   | 233.49    | 95.76  |
| 2000 | 8.71  | 555.48   | 841.22  | 988.09    | 125.73    | 192.62  | 245.85   | 442.46   | 131.41   | 252.39    | 100.74 |
| 2001 | 8.91  | 622.61   | 886.09  | 1040.73   | 128.97    | 206.80  | 261.01   | 480.53   | 135.05   | 279.82    | 107.59 |
| 2002 | 9.02  | 678.77   | 929.51  | 1086.41   | 131.41    | 224.33  | 273.56   | 510.18   | 139.24   | 302.13    | 113.18 |
| 2003 | 9.15  | 727.46   | 966.49  | 1122.61   | 133.18    | 242.47  | 287.07   | 535.24   | 142.89   | 325.30    | 118.08 |
| 2004 | 9.28  | 783.03   | 1022.93 | 1168.23   | 135.27    | 261.93  | 300.49   | 561.87   | 148.98   | 347.84    | 124.51 |
| 2005 | 9.41  | 836.28   | 1060.19 | 1200.64   | 137.48    | 288.29  | 318.76   | 590.26   | 157.73   | 373.55    | 131.25 |
| 2006 | 9.58  | 883.62   | 1099.07 | 1234.88   | 139.78    | 322.55  | 357.11   | 615.81   | 172.98   | 408.96    | 137.86 |
| 2007 | 9.71  | 921.55   | 1158.82 | 1287.97   | 141.68    | 350.81  | 379.97   | 636.38   | 186.03   | 433.84    | 144.05 |
| 2008 | 9.84  | 956.72   | 1203.64 | 1331.80   | 143.88    | 379.76  | 400.83   | 655.26   | 197.70   | 459.60    | 150.72 |
| 2009 | 9.96  | 986.30   | 1258.86 | 1390.65   | 146.68    | 410.90  | 420.39   | 673.96   | 208.64   | 482.04    | 157.81 |
| 2010 | 10.10 | 1030.87  | 1287.55 | 1414.91   | 152.49    | 460.58  | 446.53   | 699.72   | 223.83   | 510.82    | 168.17 |
| 2011 | 10.29 | 1069.98  | 1298.62 | 1424.80   | 157.60    | 511.67  | 479.16   | 720.97   | 242.43   | 543.34    | 178.87 |
| 2012 | 10.49 | 1118.33  | 1303.84 | 1430.17   | 163.53    | 568.94  | 513.55   | 742.59   | 258.45   | 576.02    | 192.07 |
| 2013 | 10.67 | 1161.17  | 1319.73 | 1442.01   | 169.55    | 617.98  | 540.78   | 761.79   | 273.58   | 601.52    | 199.26 |
| 2014 | 10.86 | 1203.51  | 1334.52 | 1454.42   | 176.01    | 663.64  | 571.72   | 781.58   | 288.59   | 629.08    | 207.54 |
| 2015 | 11.03 | 1236.43  | 1358.26 | 1479.42   | 181.15    | 697.28  | 595.56   | 798.22   | 301.59   | 650.02    | 215.67 |
| 2016 | 11.09 | 1240.28  | 1403.46 | 1547.11   | 182.01    | 702.53  | 598.73   | 800.32   | 304.04   | 652.99    | 216.99 |
| 2017 | 11.31 | 1272.05  | 1514.55 | 1730.42   | 189.48    | 739.23  | 632.18   | 818.49   | 322.45   | 679.54    | 227.39 |

43

**Table S3. The annual urban area, AI, and AGR of GBA during 1986-2017**

| Year | Area<br>(km <sup>2</sup> ) | Period    | AI<br>(km <sup>2</sup> /year) | AGR<br>% |
|------|----------------------------|-----------|-------------------------------|----------|
| 1986 | 652.74                     |           |                               |          |
| 1987 | 841.45                     | 1986-1987 | 188.72                        | 28.91    |
| 1988 | 1071.46                    | 1987-1988 | 230.01                        | 27.33    |
| 1989 | 1252.60                    | 1988-1989 | 181.14                        | 16.91    |
| 1990 | 1424.59                    | 1989-1990 | 171.99                        | 13.73    |
| 1991 | 1618.34                    | 1990-1991 | 193.75                        | 13.60    |
| 1992 | 1845.35                    | 1991-1992 | 227.01                        | 14.03    |
| 1993 | 2120.71                    | 1992-1993 | 275.37                        | 14.92    |
| 1994 | 2425.67                    | 1993-1994 | 304.96                        | 14.38    |
| 1995 | 2732.68                    | 1994-1995 | 307.01                        | 12.66    |
| 1996 | 3047.81                    | 1995-1996 | 315.13                        | 11.53    |
| 1997 | 3263.04                    | 1996-1997 | 215.23                        | 7.06     |
| 1998 | 3473.43                    | 1997-1998 | 210.40                        | 6.45     |
| 1999 | 3655.86                    | 1998-1999 | 182.42                        | 5.25     |
| 2000 | 3884.71                    | 1999-2000 | 228.85                        | 6.26     |
| 2001 | 4158.11                    | 2000-2001 | 273.40                        | 7.04     |
| 2002 | 4397.75                    | 2001-2002 | 239.65                        | 5.76     |
| 2003 | 4609.93                    | 2002-2003 | 212.17                        | 4.82     |
| 2004 | 4864.37                    | 2003-2004 | 254.44                        | 5.52     |
| 2005 | 5103.83                    | 2004-2005 | 239.46                        | 4.92     |
| 2006 | 5382.18                    | 2005-2006 | 278.35                        | 5.45     |
| 2007 | 5650.81                    | 2006-2007 | 268.63                        | 4.99     |
| 2008 | 5889.77                    | 2007-2008 | 238.96                        | 4.23     |
| 2009 | 6146.18                    | 2008-2009 | 256.41                        | 4.35     |
| 2010 | 6405.57                    | 2009-2010 | 259.39                        | 4.22     |
| 2011 | 6637.73                    | 2010-2011 | 232.17                        | 3.62     |
| 2012 | 6877.98                    | 2011-2012 | 240.24                        | 3.62     |
| 2013 | 7098.02                    | 2012-2013 | 220.05                        | 3.20     |
| 2014 | 7321.47                    | 2013-2014 | 223.44                        | 3.15     |
| 2015 | 7524.63                    | 2014-2015 | 203.17                        | 2.77     |
| 2016 | 7659.56                    | 2015-2016 | 134.92                        | 1.79     |
| 2017 | 8137.09                    | 2016-2017 | 477.53                        | 6.23     |

44

45

S2. Figures

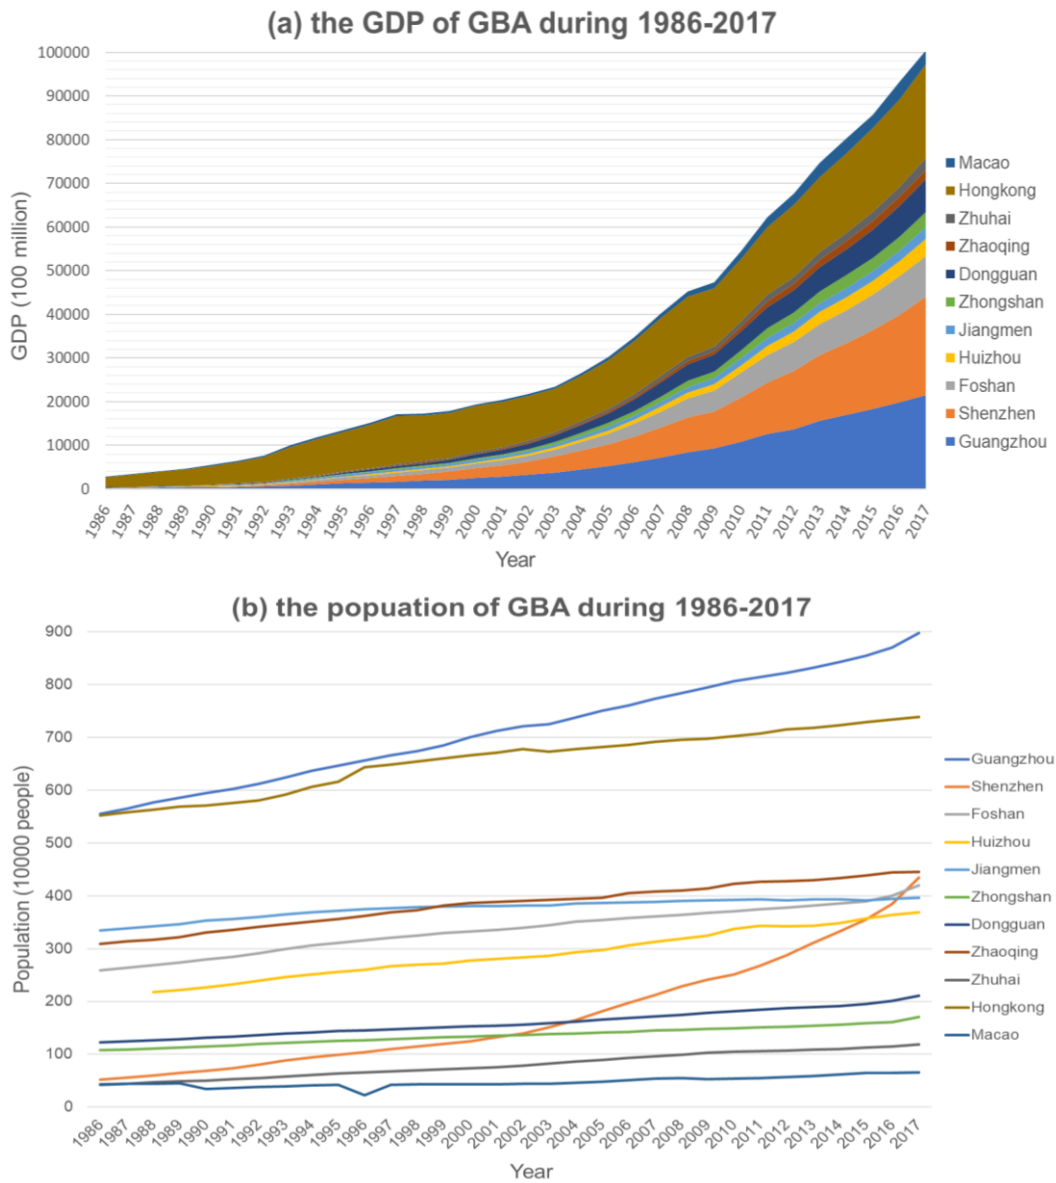

Figure S1. The changes of (a) GDP and (b) population of the 11 cities in GBA during 1986-2017

S3. Video

Movie S1. The annual urban expansion process of GBA during 1986-2017
